# Supplementary material for: Isolation of an Aptamer that Binds Specifically to E. coli
Source: PubMed Central journal article supplement (PMC4841571; doi:10.1371/journal.pone.0153637), 2016-04-22

88 bp —  
88 nt —

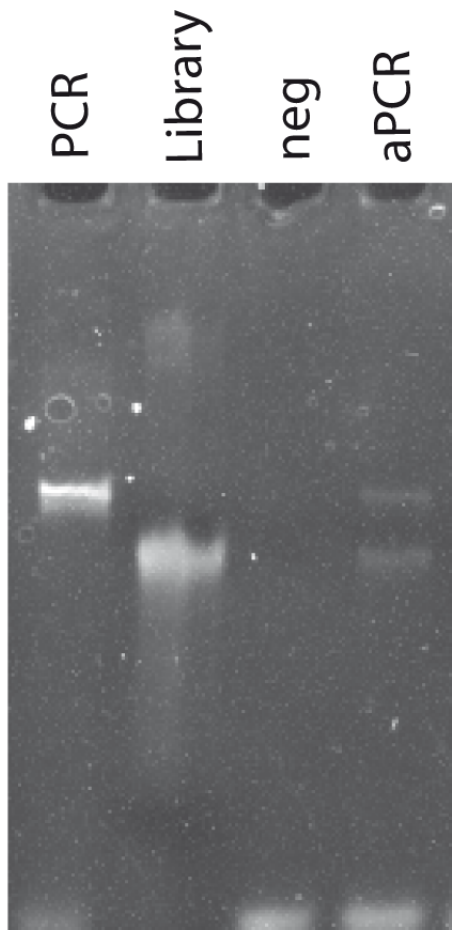

Supplement: pone.0153637.s001.pdf [file pone.0153637.s001.pdf]
