# Supplementary material for: Isolation of an Aptamer that Binds Specifically to E. coli
Source: PubMed Central journal article supplement (PMC4841571; doi:10.1371/journal.pone.0153637), 2016-04-22

# P12-31

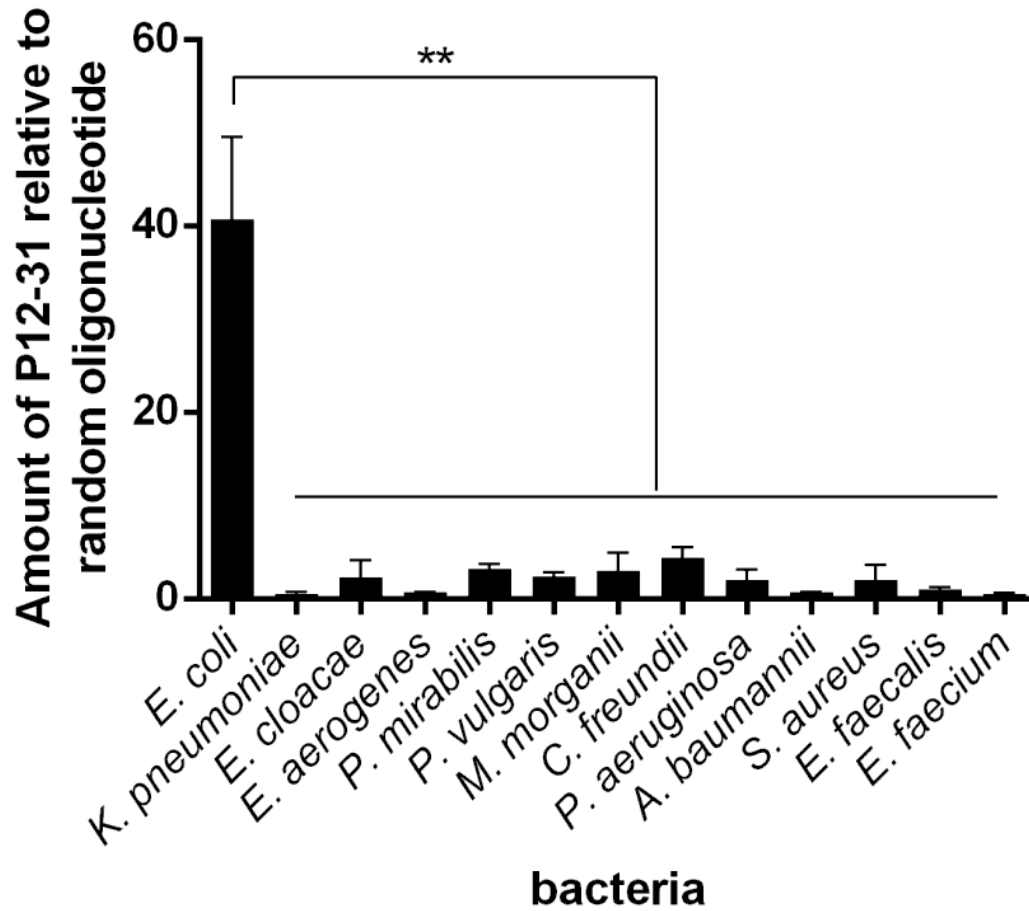

Supplement: pone.0153637.s002.pdf [file pone.0153637.s002.pdf]
