# Supplementary material for: Isolation of an Aptamer that Binds Specifically to E. coli
Source: PubMed Central journal article supplement (PMC4841571; doi:10.1371/journal.pone.0153637), 2016-04-22
Supplement: pone.0153637.s004.pdf [file pone.0153637.s004.pdf]

# P12-52

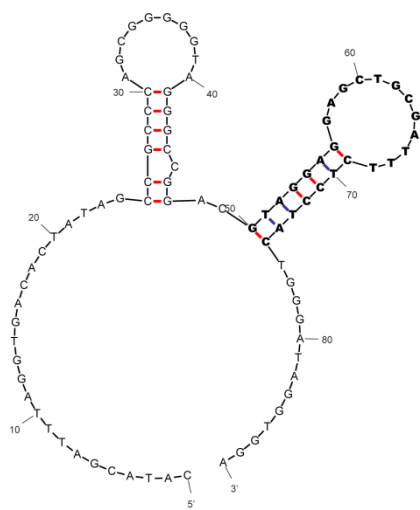

dG = -11.09 P12-52

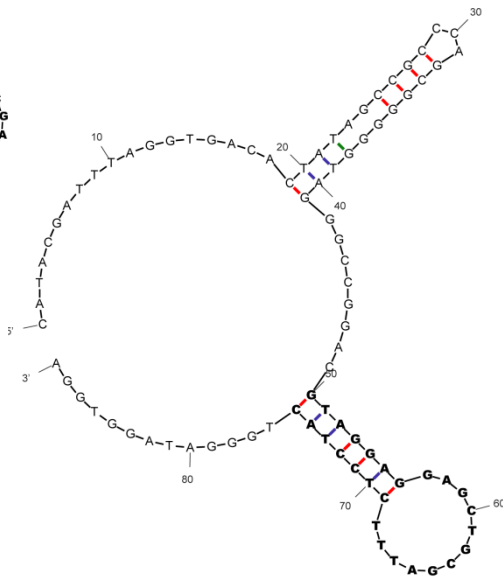

dG = -11.00 P12-52

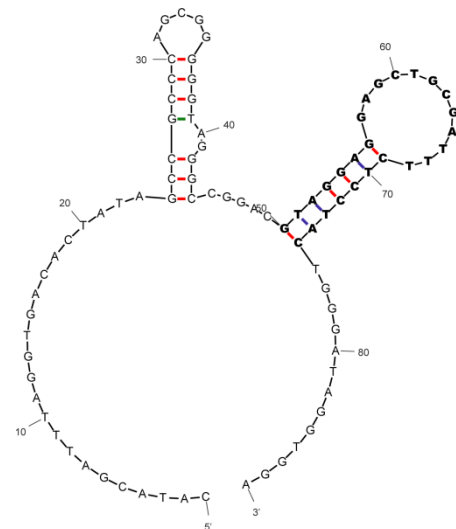

dG = -10.30 P12-52

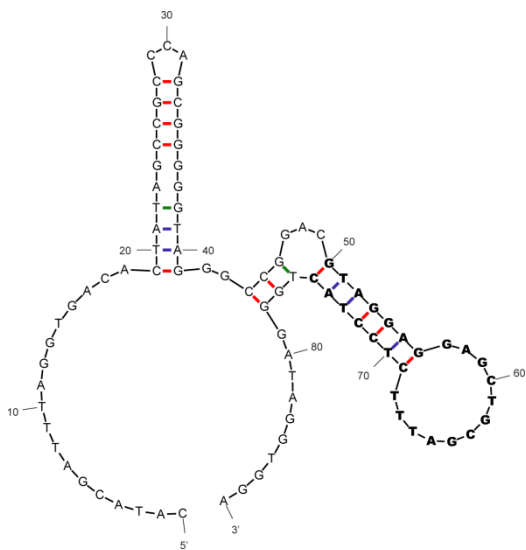

dG = -10.19 P12-52

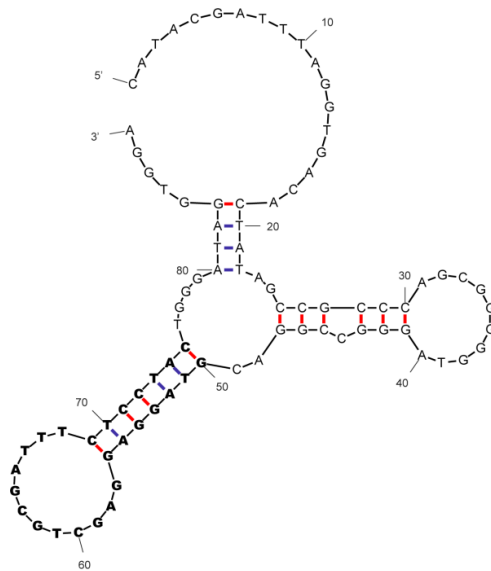

dG = -10.15 P12-52
