# Supplementary material for: Isolation of an Aptamer that Binds Specifically to E. coli
Source: PubMed Central journal article supplement (PMC4841571; doi:10.1371/journal.pone.0153637), 2016-04-22
Supplement: pone.0153637.s005.pdf [file pone.0153637.s005.pdf]

**TABLE S1: Conditions used in iterative rounds of *E. coli* SELEX.**

| Selection Round | Bacteria (cels/mL) | Aptamer (pmols)                            | Competitor                                 | Binding time (min) | Washes (time, number, volume) ** |
|-----------------|--------------------|--------------------------------------------|--------------------------------------------|--------------------|----------------------------------|
| 1               | 10 <sup>7</sup>    | 1500 (4.59 x 10 <sup>14</sup> molecules) * | —                                          | 45                 | 3 min, 1 x, 1 mL                 |
| 2               | 10 <sup>7</sup>    | 6.8                                        | —                                          | 45                 | 3 min, 1 x, 1 mL                 |
| 3               | 10 <sup>7</sup>    | 34.4                                       | 0.1 µg/µl salmon sperm DNA                 | 45                 | 3 min, 1 x, 1 mL                 |
| 4               | 10 <sup>6</sup>    | 75.5                                       | 0.1 µg/µl salmon sperm DNA                 | 45                 | 3 min, 1 x, 1 mL                 |
| 5               | 10 <sup>6</sup>    | 22                                         | 0.1 µg/µl salmon sperm DNA, 0.05 µg/µl BSA | 45                 | 3 min, 3 x, 1 mL                 |
| 6               | 10 <sup>5</sup>    | 12                                         | 0.1 µg/µl salmon sperm DNA, BSA 0.05 µg/µl | 45                 | 3 min, 3 x, 1 mL                 |
| 7               | 10 <sup>4</sup>    | 17                                         | 0.05 µg/µl BSA                             | 45                 | 3 min, 3 x, 1 mL                 |
| 8               | 10 <sup>4</sup>    | 6.8                                        | 0.2 µg/µl salmon sperm DNA, 0.1 µg/µl BSA  | 45                 | 3 min, 3 x, 1 mL                 |
| 9               | 10 <sup>4</sup>    | 6.1                                        | 0.2 µg/µl salmon sperm DNA, 0.1 µg/µl BSA  | 45                 | 20 min, 3 x, 1 mL                |
| 10              | 10 <sup>3</sup>    | 8.9                                        | 0.2 µg/µl salmon sperm DNA, 0.1 µg/µl BSA  | 30                 | 20 min, 2 x, 1 mL                |
| 11              | 10 <sup>3</sup>    | 6.5                                        | 0.2 µg/µl salmon sperm DNA                 | 30                 | 20 min, 6x, 1 mL                 |
| 12              | 10 <sup>3</sup>    | 4.4                                        | 0.2 µg/µl BSA                              | 30                 | 20 min, 6 x, 1 mL                |
|                 |                    | 4.2                                        |                                            |                    |                                  |

\*Correspond to the library ssDNA population.

\*\* Washes were done with selection buffer (PBS containing 1.4 mM MgCl<sub>2</sub>).
