# Supplementary material for: Isolation of an Aptamer that Binds Specifically to E. coli
Source: PubMed Central journal article supplement (PMC4841571; doi:10.1371/journal.pone.0153637), 2016-04-22
Supplement: pone.0153637.s006.pdf [file pone.0153637.s006.pdf]

**TABLE S2: Statistical P-values (t-test) for the differences in binding of aptamer P12-31 to *E. coli* vs. different bacterial species.**

| <b>Bacteria</b>      | <b>P-value</b> |
|----------------------|----------------|
| <i>K. Pneumoniae</i> | 0.0014         |
| <i>E. cloacae</i>    | 0.0018         |
| <i>E. aerogenes</i>  | 0.0014         |
| <i>P. mirabilis</i>  | 0.0018         |
| <i>P. vulgaris</i>   | 0.0017         |
| <i>M. morgani</i>    | 0.0019         |
| <i>C. freundii</i>   | 0.0021         |
| <i>P. aeruginosa</i> | 0.0017         |
| <i>A. baumannii</i>  | 0.0014         |
| <i>S. aureus</i>     | 0.0017         |
| <i>E. faecalis</i>   | 0.0015         |
| <i>E. faecium</i>    | 0.0014         |
